# Supplementary material
Source: publisher figshare collection journal article supplement (https://acs.figshare.com/ndownloader/files/4231978)
Supplement: Supplementary file 1 [file 4231978]

 
data_str1227
_publ_contact_author_name        'Jose A. Mata Mart\'inez'
_publ_contact_author_address     
;Universitat Jaume I
Avda. Sos Baynat s/n
12071, Castell\'on
Spain
;
_publ_contact_author_email       jmata@qio.uji.es
_publ_contact_author_phone       964729166
_publ_contact_author_fax         964728214
loop_
_publ_author_name
_publ_author_address
'Mata, Jose A.'
;Universitat Jaume I
Avda. Sos Baynat s/n
12071, Castell\'on
Spain
;

_audit_creation_method           SHELXL-97
_chemical_name_systematic        
; 
 ? 
;
_chemical_name_common            ?
_chemical_melting_point          ?
_chemical_formula_moiety         'C13 H17 I2 N6 Pd, B F4'
_chemical_formula_sum            'C13 H17 B F4 I2 N6 Pd'
_chemical_formula_weight         704.34

loop_
_atom_type_symbol
_atom_type_description
_atom_type_scat_dispersion_real
_atom_type_scat_dispersion_imag
_atom_type_scat_source
C C 0.0033 0.0016 'International Tables Vol C Tables 4.2.6.8 and 6.1.1.4'
H H 0.0000 0.0000 'International Tables Vol C Tables 4.2.6.8 and 6.1.1.4'
B B 0.0013 0.0007 'International Tables Vol C Tables 4.2.6.8 and 6.1.1.4'
N N 0.0061 0.0033 'International Tables Vol C Tables 4.2.6.8 and 6.1.1.4'
F F 0.0171 0.0103 'International Tables Vol C Tables 4.2.6.8 and 6.1.1.4'
Pd Pd -0.9988 1.0072 'International Tables Vol C Tables 4.2.6.8 and 6.1.1.4'
I I -0.4742 1.8119 'International Tables Vol C Tables 4.2.6.8 and 6.1.1.4'

_symmetry_cell_setting           monoclinic
_symmetry_Int_Tables_number      14
_symmetry_space_group_name_H-M   P2(1)/c
_symmetry_space_group_name_Hall  -P2ybc

loop_
_symmetry_equiv_pos_as_xyz
'x, y, z'
'-x, y+1/2, -z+1/2'
'-x, -y, -z'
'x, -y-1/2, z-1/2'

_cell_length_a                   9.4486(2)
_cell_length_b                   23.6206(6)
_cell_length_c                   9.3608(2)
_cell_angle_alpha                90.00
_cell_angle_beta                 90.187(2)
_cell_angle_gamma                90.00
_cell_volume                     2089.15(8)
_cell_formula_units_Z            4
_cell_measurement_temperature    293(2)
_cell_measurement_reflns_used    ?
_cell_measurement_theta_min      ?
_cell_measurement_theta_max      ?

_exptl_crystal_description       Prism
_exptl_crystal_colour            Orange
_exptl_crystal_size_max          0.17
_exptl_crystal_size_mid          0.15
_exptl_crystal_size_min          0.10
_exptl_crystal_density_meas      ?
_exptl_crystal_density_diffrn    2.239
_exptl_crystal_density_method    'not measured'
_exptl_crystal_F_000             1320
_exptl_absorpt_coefficient_mu    3.889
_exptl_absorpt_correction_type   empirical
_exptl_absorpt_correction_T_min  0.25
_exptl_absorpt_correction_T_max  0.95
_exptl_absorpt_process_details   ?

_exptl_special_details           
; 
 ? 
;

_diffrn_ambient_temperature      293(2)
_diffrn_radiation_wavelength     0.71073
_diffrn_radiation_type           MoK\a
_diffrn_radiation_source         'fine-focus sealed tube'
_diffrn_radiation_monochromator  graphite
_diffrn_measurement_device_type  ?
_diffrn_measurement_method       ?
_diffrn_detector_area_resol_mean ?
_diffrn_standards_number         ?
_diffrn_standards_interval_count ?
_diffrn_standards_interval_time  ?
_diffrn_standards_decay_%        ?
_diffrn_reflns_number            12023
_diffrn_reflns_av_R_equivalents  0.0376
_diffrn_reflns_av_sigmaI/netI    0.0465
_diffrn_reflns_limit_h_min       -12
_diffrn_reflns_limit_h_max       11
_diffrn_reflns_limit_k_min       -23
_diffrn_reflns_limit_k_max       30
_diffrn_reflns_limit_l_min       -12
_diffrn_reflns_limit_l_max       12
_diffrn_reflns_theta_min         2.76
_diffrn_reflns_theta_max         27.50
_reflns_number_total             4461
_reflns_number_gt                3528
_reflns_threshold_expression     >2sigma(I)

_computing_data_collection       ?
_computing_cell_refinement       ?
_computing_data_reduction        ?
_computing_structure_solution    'SHELXS-97 (Sheldrick, 1990)'
_computing_structure_refinement  'SHELXL-97 (Sheldrick, 1997)'
_computing_molecular_graphics    ?
_computing_publication_material  ?

_refine_special_details          
; 
 Refinement of F^2^ against ALL reflections.  The weighted R-factor wR and 
 goodness of fit S are based on F^2^, conventional R-factors R are based 
 on F, with F set to zero for negative F^2^. The threshold expression of 
 F^2^ > 2sigma(F^2^) is used only for calculating R-factors(gt) etc. and is 
 not relevant to the choice of reflections for refinement.  R-factors based 
 on F^2^ are statistically about twice as large as those based on F, and R- 
 factors based on ALL data will be even larger. 
;

_refine_ls_structure_factor_coef Fsqd
_refine_ls_matrix_type           full
_refine_ls_weighting_scheme      calc
_refine_ls_weighting_details     
'calc w=1/[\s^2^(Fo^2^)+(0.0258P)^2^+0.9490P] where P=(Fo^2^+2Fc^2^)/3'
_atom_sites_solution_primary     direct
_atom_sites_solution_secondary   difmap
_atom_sites_solution_hydrogens   geom
_refine_ls_hydrogen_treatment    mixed
_refine_ls_extinction_method     none
_refine_ls_extinction_coef       ?
_refine_ls_number_reflns         4461
_refine_ls_number_parameters     268
_refine_ls_number_restraints     0
_refine_ls_R_factor_all          0.0490
_refine_ls_R_factor_gt           0.0324
_refine_ls_wR_factor_ref         0.0712
_refine_ls_wR_factor_gt          0.0624
_refine_ls_goodness_of_fit_ref   1.051
_refine_ls_restrained_S_all      1.051
_refine_ls_shift/su_max          0.001
_refine_ls_shift/su_mean         0.000

loop_
_atom_site_label
_atom_site_type_symbol
_atom_site_fract_x
_atom_site_fract_y
_atom_site_fract_z
_atom_site_U_iso_or_equiv
_atom_site_adp_type
_atom_site_occupancy
_atom_site_symmetry_multiplicity
_atom_site_calc_flag
_atom_site_refinement_flags
_atom_site_disorder_assembly
_atom_site_disorder_group
I1 I 1.29780(3) 0.118951(15) 1.64000(3) 0.03213(10) Uani 1 1 d . . .
Pd1 Pd 1.41076(4) 0.093868(16) 1.39005(3) 0.02166(10) Uani 1 1 d . . .
N1 N 1.8675(4) 0.06769(17) 1.2953(4) 0.0264(9) Uani 1 1 d . . .
F1 F 0.9793(3) 0.11262(15) 0.9760(4) 0.0641(10) Uani 1 1 d . . .
C1 C 1.9373(5) 0.0934(2) 1.4013(5) 0.0320(12) Uani 1 1 d . . .
H1 H 2.016(5) 0.0796(19) 1.437(5) 0.021(12) Uiso 1 1 d . . .
B1 B 0.9748(6) 0.1694(3) 1.0138(6) 0.0333(14) Uani 1 1 d . . .
I2 I 1.30112(3) -0.010101(14) 1.38537(3) 0.02914(10) Uani 1 1 d . . .
N2 N 1.8613(4) 0.13693(18) 1.4485(4) 0.0289(10) Uani 1 1 d . . .
C2 C 1.7429(5) 0.0964(2) 1.2730(5) 0.0263(11) Uani 1 1 d . . .
F2 F 0.8467(4) 0.18134(16) 1.0780(5) 0.0793(13) Uani 1 1 d . . .
C3 C 1.7389(5) 0.1399(2) 1.3673(5) 0.0249(10) Uani 1 1 d . . .
N3 N 1.6417(4) 0.08215(17) 1.1702(4) 0.0236(9) Uani 1 1 d . . .
F3 F 0.9818(4) 0.20290(17) 0.8938(4) 0.0720(11) Uani 1 1 d . . .
C4 C 1.5000(4) 0.08228(19) 1.1997(4) 0.0214(10) Uani 1 1 d . . .
N4 N 1.4370(4) 0.07555(17) 1.0733(4) 0.0236(9) Uani 1 1 d . . .
F4 F 1.0828(6) 0.1829(2) 1.1005(6) 0.121(2) Uani 1 1 d . . .
N5 N 1.6369(4) 0.18185(17) 1.3806(4) 0.0268(9) Uani 1 1 d . . .
C5 C 1.5358(5) 0.0703(2) 0.9658(5) 0.0303(12) Uani 1 1 d . . .
H5 H 1.507(5) 0.066(2) 0.883(5) 0.027(14) Uiso 1 1 d . . .
C6 C 1.6626(5) 0.0748(2) 1.0242(5) 0.0270(11) Uani 1 1 d . . .
H6 H 1.744(5) 0.0778(18) 0.987(4) 0.012(11) Uiso 1 1 d . . .
N6 N 1.4329(4) 0.22173(17) 1.3688(4) 0.0304(9) Uani 1 1 d . . .
C7 C 1.4950(5) 0.1711(2) 1.3806(5) 0.0262(11) Uani 1 1 d . . .
C8 C 1.5337(6) 0.2638(3) 1.3624(7) 0.0430(14) Uani 1 1 d . . .
H8 H 1.512(6) 0.300(2) 1.352(6) 0.046(17) Uiso 1 1 d . . .
C9 C 1.6592(7) 0.2402(3) 1.3686(6) 0.0419(15) Uani 1 1 d . . .
H9 H 1.740(6) 0.254(2) 1.368(5) 0.035(15) Uiso 1 1 d . . .
C10 C 1.9153(5) 0.0158(2) 1.2225(5) 0.0354(12) Uani 1 1 d . . .
H10A H 1.9319 0.0238 1.1234 0.053 Uiso 1 1 calc R . .
H10B H 1.8438 -0.0129 1.2307 0.053 Uiso 1 1 calc R . .
H10C H 2.0014 0.0026 1.2660 0.053 Uiso 1 1 calc R . .
C11 C 1.8948(6) 0.1712(3) 1.5748(6) 0.0467(15) Uani 1 1 d . . .
H11A H 1.9799 0.1573 1.6187 0.070 Uiso 1 1 calc R . .
H11B H 1.8182 0.1690 1.6417 0.070 Uiso 1 1 calc R . .
H11C H 1.9082 0.2099 1.5467 0.070 Uiso 1 1 calc R . .
C12 C 1.2799(5) 0.2321(3) 1.3616(6) 0.0437(14) Uani 1 1 d . . .
H12A H 1.2320 0.1975 1.3373 0.066 Uiso 1 1 calc R . .
H12B H 1.2605 0.2602 1.2901 0.066 Uiso 1 1 calc R . .
H12C H 1.2472 0.2452 1.4527 0.066 Uiso 1 1 calc R . .
C13 C 1.2841(5) 0.0761(2) 1.0503(5) 0.0331(12) Uani 1 1 d . . .
H13A H 1.2480 0.0382 1.0570 0.050 Uiso 1 1 calc R . .
H13B H 1.2637 0.0912 0.9572 0.050 Uiso 1 1 calc R . .
H13C H 1.2401 0.0994 1.1216 0.050 Uiso 1 1 calc R . .

loop_
_atom_site_aniso_label
_atom_site_aniso_U_11
_atom_site_aniso_U_22
_atom_site_aniso_U_33
_atom_site_aniso_U_23
_atom_site_aniso_U_13
_atom_site_aniso_U_12
I1 0.03428(19) 0.0401(2) 0.02199(17) -0.00263(14) 0.00189(13) 0.00315(15)
Pd1 0.01974(18) 0.0256(2) 0.01968(18) 0.00039(15) -0.00032(13) -0.00071(16)
N1 0.024(2) 0.027(2) 0.028(2) 0.0024(18) -0.0018(16) -0.0007(18)
F1 0.035(2) 0.047(2) 0.110(3) -0.001(2) -0.0010(19) -0.0013(17)
C1 0.024(3) 0.041(4) 0.031(3) 0.008(2) -0.003(2) -0.003(3)
B1 0.024(3) 0.031(4) 0.044(4) 0.005(3) -0.005(3) 0.003(3)
I2 0.02975(18) 0.0286(2) 0.02908(18) 0.00164(13) 0.00036(13) -0.00391(14)
N2 0.020(2) 0.036(3) 0.030(2) 0.0014(19) -0.0076(16) -0.0036(19)
C2 0.021(2) 0.033(3) 0.025(2) 0.006(2) -0.0003(19) -0.002(2)
F2 0.085(3) 0.056(3) 0.097(3) 0.030(2) 0.047(2) 0.014(2)
C3 0.022(2) 0.026(3) 0.026(2) 0.004(2) -0.0026(19) -0.002(2)
N3 0.0163(19) 0.034(3) 0.0203(19) 0.0033(17) -0.0038(15) -0.0001(17)
F3 0.075(3) 0.071(3) 0.071(3) 0.016(2) 0.019(2) 0.003(2)
C4 0.019(2) 0.022(3) 0.023(2) 0.0064(19) 0.0002(18) 0.002(2)
N4 0.0208(19) 0.033(2) 0.0172(19) 0.0006(16) -0.0021(15) 0.0003(18)
F4 0.128(4) 0.086(4) 0.150(5) -0.036(3) -0.088(4) 0.029(3)
N5 0.022(2) 0.025(2) 0.033(2) -0.0006(18) -0.0031(17) -0.0012(18)
C5 0.030(3) 0.042(3) 0.019(3) 0.000(2) -0.002(2) 0.000(2)
C6 0.024(3) 0.037(3) 0.020(2) 0.001(2) 0.007(2) -0.001(2)
N6 0.031(2) 0.022(2) 0.038(2) 0.0000(19) -0.0028(18) 0.001(2)
C7 0.028(3) 0.027(3) 0.023(2) -0.004(2) -0.0022(19) 0.000(2)
C8 0.044(3) 0.021(3) 0.064(4) 0.007(3) -0.005(3) 0.002(3)
C9 0.037(3) 0.034(4) 0.055(4) 0.000(3) -0.007(3) -0.012(3)
C10 0.029(3) 0.038(3) 0.039(3) -0.003(2) -0.008(2) 0.003(2)
C11 0.043(3) 0.050(4) 0.048(3) -0.015(3) -0.017(3) 0.004(3)
C12 0.029(3) 0.044(4) 0.059(4) 0.008(3) 0.002(3) 0.012(3)
C13 0.026(3) 0.049(4) 0.025(2) -0.001(2) -0.006(2) 0.005(2)

_geom_special_details            
; 
 All esds (except the esd in the dihedral angle between two l.s. planes) 
 are estimated using the full covariance matrix.  The cell esds are taken 
 into account individually in the estimation of esds in distances, angles 
 and torsion angles; correlations between esds in cell parameters are only 
 used when they are defined by crystal symmetry.  An approximate (isotropic) 
 treatment of cell esds is used for estimating esds involving l.s. planes. 
;

loop_
_geom_bond_atom_site_label_1
_geom_bond_atom_site_label_2
_geom_bond_distance
_geom_bond_site_symmetry_2
_geom_bond_publ_flag
I1 Pd1 2.6421(4) . ?
Pd1 C7 1.992(5) . ?
Pd1 C4 1.993(4) . ?
Pd1 I2 2.6656(5) . ?
N1 C1 1.335(6) . ?
N1 C2 1.375(6) . ?
N1 C10 1.474(6) . ?
F1 B1 1.387(7) . ?
C1 N2 1.332(7) . ?
B1 F4 1.340(7) . ?
B1 F3 1.376(7) . ?
B1 F2 1.383(7) . ?
N2 C3 1.384(6) . ?
N2 C11 1.467(6) . ?
C2 C3 1.354(7) . ?
C2 N3 1.396(6) . ?
C3 N5 1.388(6) . ?
N3 C4 1.368(5) . ?
N3 C6 1.392(6) . ?
C4 N4 1.332(5) . ?
N4 C5 1.380(6) . ?
N4 C13 1.460(6) . ?
N5 C7 1.365(6) . ?
N5 C9 1.399(7) . ?
C5 C6 1.320(7) . ?
N6 C7 1.337(6) . ?
N6 C8 1.378(7) . ?
N6 C12 1.467(6) . ?
C8 C9 1.311(8) . ?

loop_
_geom_angle_atom_site_label_1
_geom_angle_atom_site_label_2
_geom_angle_atom_site_label_3
_geom_angle
_geom_angle_site_symmetry_1
_geom_angle_site_symmetry_3
_geom_angle_publ_flag
C7 Pd1 C4 85.17(18) . . ?
C7 Pd1 I1 89.80(13) . . ?
C4 Pd1 I1 174.88(13) . . ?
C7 Pd1 I2 176.44(13) . . ?
C4 Pd1 I2 91.39(13) . . ?
I1 Pd1 I2 93.617(14) . . ?
C1 N1 C2 108.0(4) . . ?
C1 N1 C10 124.7(4) . . ?
C2 N1 C10 127.2(4) . . ?
N2 C1 N1 109.4(4) . . ?
F4 B1 F3 108.6(5) . . ?
F4 B1 F2 110.7(6) . . ?
F3 B1 F2 106.3(5) . . ?
F4 B1 F1 111.2(5) . . ?
F3 B1 F1 110.3(5) . . ?
F2 B1 F1 109.6(5) . . ?
C1 N2 C3 107.9(4) . . ?
C1 N2 C11 125.4(4) . . ?
C3 N2 C11 126.4(4) . . ?
C3 C2 N1 107.5(4) . . ?
C3 C2 N3 127.7(4) . . ?
N1 C2 N3 124.7(4) . . ?
C2 C3 N2 107.2(4) . . ?
C2 C3 N5 128.4(4) . . ?
N2 C3 N5 124.4(4) . . ?
C4 N3 C6 109.9(4) . . ?
C4 N3 C2 121.9(4) . . ?
C6 N3 C2 127.4(4) . . ?
N4 C4 N3 104.8(3) . . ?
N4 C4 Pd1 128.4(3) . . ?
N3 C4 Pd1 126.7(3) . . ?
C4 N4 C5 110.9(4) . . ?
C4 N4 C13 124.7(4) . . ?
C5 N4 C13 124.4(4) . . ?
C7 N5 C3 123.3(4) . . ?
C7 N5 C9 109.4(4) . . ?
C3 N5 C9 126.3(4) . . ?
C6 C5 N4 107.8(4) . . ?
C5 C6 N3 106.5(4) . . ?
C7 N6 C8 110.2(4) . . ?
C7 N6 C12 125.8(4) . . ?
C8 N6 C12 124.0(5) . . ?
N6 C7 N5 105.3(4) . . ?
N6 C7 Pd1 130.4(4) . . ?
N5 C7 Pd1 124.3(4) . . ?
C9 C8 N6 108.5(5) . . ?
C8 C9 N5 106.6(5) . . ?

loop_
_geom_torsion_atom_site_label_1
_geom_torsion_atom_site_label_2
_geom_torsion_atom_site_label_3
_geom_torsion_atom_site_label_4
_geom_torsion
_geom_torsion_site_symmetry_1
_geom_torsion_site_symmetry_2
_geom_torsion_site_symmetry_3
_geom_torsion_site_symmetry_4
_geom_torsion_publ_flag
C2 N1 C1 N2 0.8(6) . . . . ?
C10 N1 C1 N2 -176.2(4) . . . . ?
N1 C1 N2 C3 -1.2(6) . . . . ?
N1 C1 N2 C11 172.4(5) . . . . ?
C1 N1 C2 C3 0.0(5) . . . . ?
C10 N1 C2 C3 176.9(4) . . . . ?
C1 N1 C2 N3 179.8(4) . . . . ?
C10 N1 C2 N3 -3.3(7) . . . . ?
N1 C2 C3 N2 -0.8(5) . . . . ?
N3 C2 C3 N2 179.5(4) . . . . ?
N1 C2 C3 N5 176.8(4) . . . . ?
N3 C2 C3 N5 -3.0(8) . . . . ?
C1 N2 C3 C2 1.2(5) . . . . ?
C11 N2 C3 C2 -172.3(5) . . . . ?
C1 N2 C3 N5 -176.4(4) . . . . ?
C11 N2 C3 N5 10.0(8) . . . . ?
C3 C2 N3 C4 -43.5(7) . . . . ?
N1 C2 N3 C4 136.7(5) . . . . ?
C3 C2 N3 C6 125.7(6) . . . . ?
N1 C2 N3 C6 -54.0(7) . . . . ?
C6 N3 C4 N4 -0.5(5) . . . . ?
C2 N3 C4 N4 170.5(4) . . . . ?
C6 N3 C4 Pd1 -177.8(4) . . . . ?
C2 N3 C4 Pd1 -6.9(6) . . . . ?
C7 Pd1 C4 N4 -112.6(4) . . . . ?
I1 Pd1 C4 N4 -101.2(14) . . . . ?
I2 Pd1 C4 N4 66.5(4) . . . . ?
C7 Pd1 C4 N3 64.2(4) . . . . ?
I1 Pd1 C4 N3 75.6(15) . . . . ?
I2 Pd1 C4 N3 -116.8(4) . . . . ?
N3 C4 N4 C5 1.0(5) . . . . ?
Pd1 C4 N4 C5 178.2(4) . . . . ?
N3 C4 N4 C13 -176.5(4) . . . . ?
Pd1 C4 N4 C13 0.8(7) . . . . ?
C2 C3 N5 C7 46.4(7) . . . . ?
N2 C3 N5 C7 -136.4(5) . . . . ?
C2 C3 N5 C9 -120.7(6) . . . . ?
N2 C3 N5 C9 56.5(7) . . . . ?
C4 N4 C5 C6 -1.1(6) . . . . ?
C13 N4 C5 C6 176.4(5) . . . . ?
N4 C5 C6 N3 0.8(6) . . . . ?
C4 N3 C6 C5 -0.2(6) . . . . ?
C2 N3 C6 C5 -170.5(5) . . . . ?
C8 N6 C7 N5 -0.4(5) . . . . ?
C12 N6 C7 N5 178.9(4) . . . . ?
C8 N6 C7 Pd1 -178.4(4) . . . . ?
C12 N6 C7 Pd1 0.9(7) . . . . ?
C3 N5 C7 N6 -168.9(4) . . . . ?
C9 N5 C7 N6 0.1(5) . . . . ?
C3 N5 C7 Pd1 9.2(6) . . . . ?
C9 N5 C7 Pd1 178.2(3) . . . . ?
C4 Pd1 C7 N6 112.5(4) . . . . ?
I1 Pd1 C7 N6 -66.5(4) . . . . ?
I2 Pd1 C7 N6 98(2) . . . . ?
C4 Pd1 C7 N5 -65.2(4) . . . . ?
I1 Pd1 C7 N5 115.8(4) . . . . ?
I2 Pd1 C7 N5 -80(2) . . . . ?
C7 N6 C8 C9 0.6(7) . . . . ?
C12 N6 C8 C9 -178.7(5) . . . . ?
N6 C8 C9 N5 -0.5(7) . . . . ?
C7 N5 C9 C8 0.3(6) . . . . ?
C3 N5 C9 C8 168.9(5) . . . . ?

_diffrn_measured_fraction_theta_max 0.929
_diffrn_reflns_theta_full        25.00
_diffrn_measured_fraction_theta_full 0.973
_refine_diff_density_max         0.787
_refine_diff_density_min         -0.894
_refine_diff_density_rms         0.137
